# Supplementary material for: Increased tumor-infiltrating plasmacytoid dendritic cells promote cancer cell proliferation and invasion via TNF-α/NF-κB/CXCR-4 pathway in oral squamous cell carcinoma
Source: PubMed Central journal article supplement (PMC8040884; doi:10.7150/jca.55580), 2021-03-19
Supplement: jcav12p3045s1.pdf [file jcav12p3045s1.pdf]

**Supplemental Table 1** Spearman's rank correlation coefficient analysis between tumor-infiltrating pDC and CXCR-4/7 expression.

Correlation coefficient

|              |        |                   | pDC    | CXCR-4 |
|--------------|--------|-------------------|--------|--------|
| Spearman Rho | pDC    | R                 | 1.000  | .669** |
|              |        | Sig. (two tailed) | .      | .000   |
|              |        | N                 | 66     | 66     |
|              | CXCR-4 | R                 | .669** | 1.000  |
|              |        | Sig. (two tailed) | .000   | .      |
|              |        | N                 | 66     | 66     |

\*\* . correlation significant at 0.01 level

Correlation coefficient

|              |        |                   | pDC   | CXCR-7 |
|--------------|--------|-------------------|-------|--------|
| Spearman Rho | pDC    | R                 | 1.000 | .024   |
|              |        | Sig. (two tailed) | .     | .84    |
|              |        | N                 | 66    | 66     |
|              | CXCR-7 | R                 | .024  | 1.000  |
|              |        | Sig. (two tailed) | .84   | .      |
|              |        | N                 | 66    | 66     |

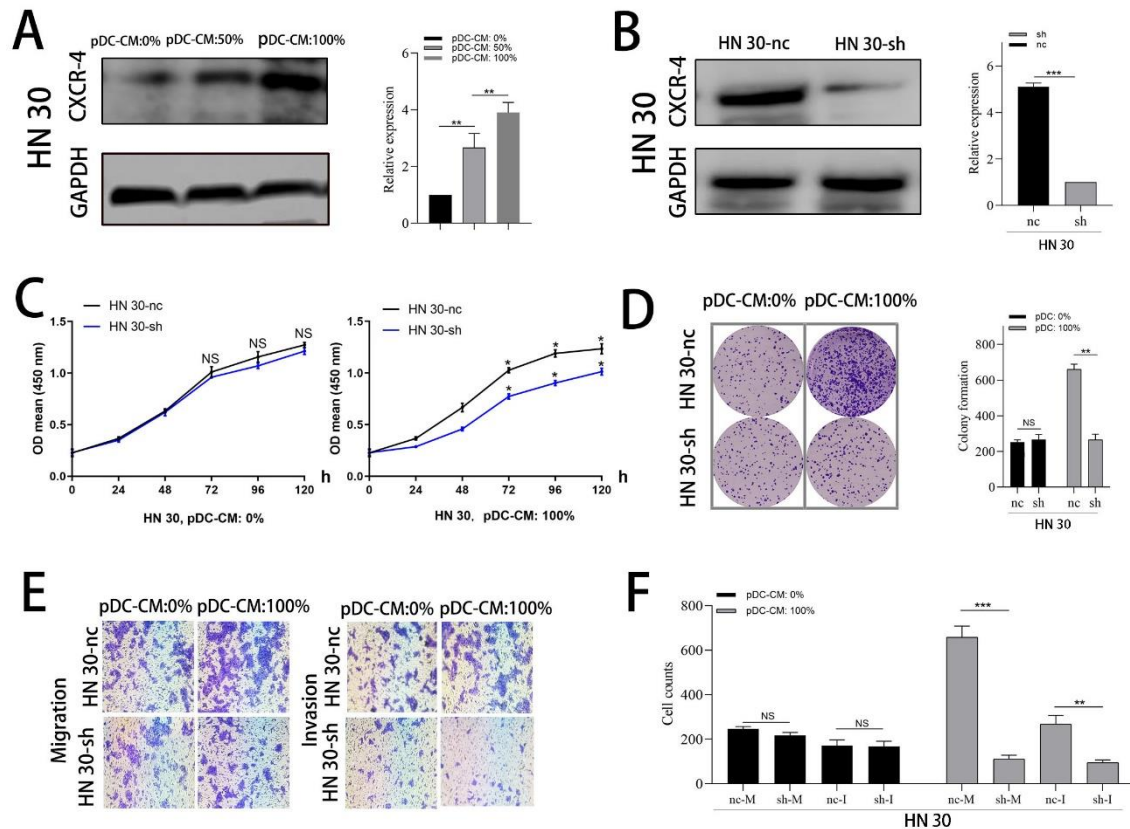

**Supplemental Figure 1.** CXCR-4 is involved in pDC-mediated HN 30 cells proliferation, migration and invasion. **(A)** Increased CXCR-4 expression was detected by western blotting after pDC-CM treatment in HN 30 cells for 72 hours. **(B)** HN 30 cells were cultured in 6-well cell culture plates and transfected with the lentivirus-CXCR-4-shRNA(sh) or negative control (nc). CXCR-4 expression was further detected by western blotting after transfection. The effect of pDC-CM on HN 30-nc and HN 30-sh growth rates were assessed by CCK-8 **(C)** and colony formation assays **(D)**. **(E)** Representative image of cell migration and invasion by transwell assay. **(F)** HN 30 cell migration (nc/sh-M) and invasion (nc/sh-I) were both decreased in the CXCR-4-silenced group upon pDC-CM treatment. NS, no significance. \*,  $P < 0.05$ ; \*\*,  $P < 0.01$ ; \*\*\*,  $P < 0.001$ .

See below for STR results of cell lines

- 1、 Sample ID: CAL27
- 2、 Original Material: Cell pellets
- 3、 Check time:2019-7-4
- 4、 Methods:

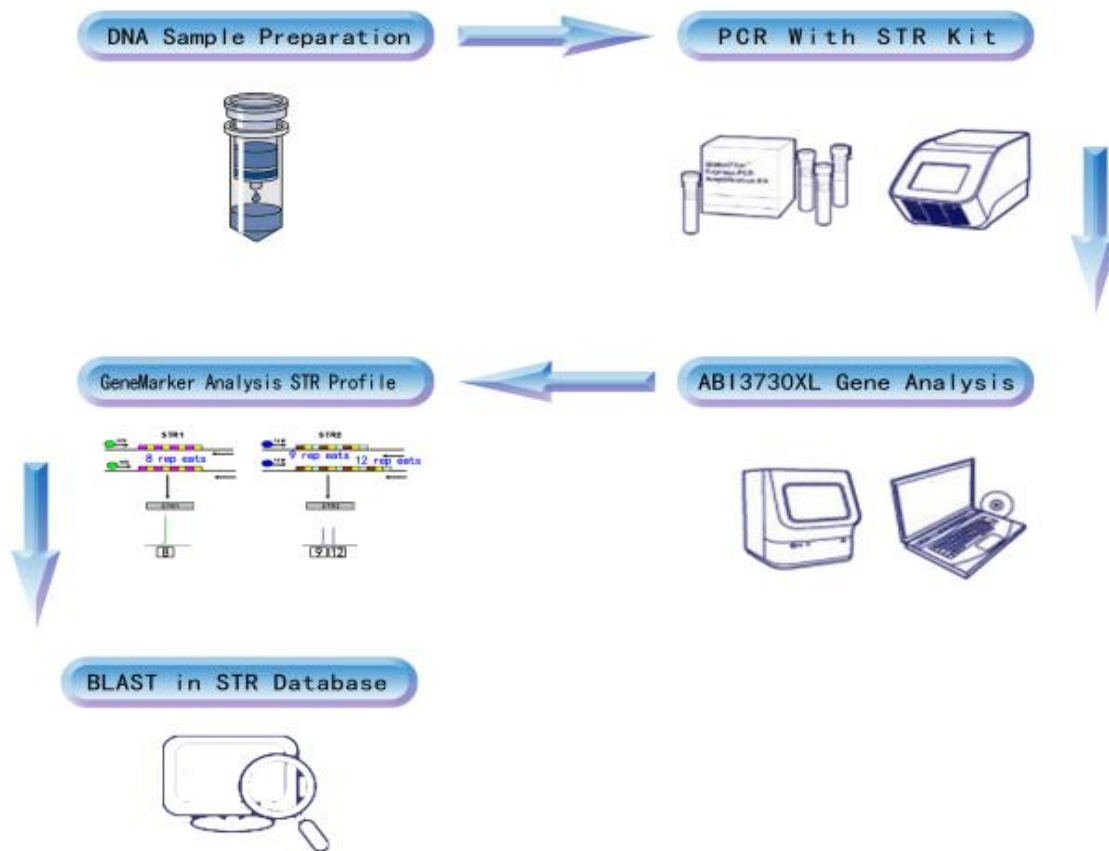

5、 Results:

Negative and positive test results are correct.

Amplification map of Genomic DNA clear, Genotyping results well.

STR Profile :

| Genetic Site                                                           | Customer sample |     | ATCC  |     |
|------------------------------------------------------------------------|-----------------|-----|-------|-----|
|                                                                        | CAL27           |     | CAL27 |     |
| Amelogenin                                                             | X               | X   | X     | X   |
| CSF1PO                                                                 | 10              | 12  | 10    | 12  |
| D13S317                                                                | 10              | 11  | 10    | 11  |
| D16S539                                                                | 11              | 12  | 11    | 12  |
| D5S818                                                                 | 11              | 12  | 11    | 12  |
| D7S820                                                                 | 10              | 10  | 10    | 10  |
| THO1                                                                   | 6               | 9.3 | 6     | 9.3 |
| TPOX                                                                   | 8               | 8   | 8     | 8   |
| vWA                                                                    | 14              | 17  | 14    | 17  |
| Percent match between the sample and the database profile: <b>100%</b> |                 |     |       |     |

6、 Summary:

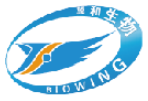

| 细胞的 STR 位点和 Amelogenin 位点的基因分型结果 |             |         |         |                  |         |         |
|----------------------------------|-------------|---------|---------|------------------|---------|---------|
| Loci                             | 送检细胞 STR 信息 |         |         | 细胞库细胞 STR 信息     |         |         |
|                                  | 送检细胞名: HN30 |         |         | 细胞库细胞名: WSU-HN30 |         |         |
|                                  | Allele1     | Allele2 | Allele3 | Allele1          | Allele2 | Allele3 |
| D5S818                           | 12          | 13      |         | 12               | 13      |         |
| D13S317                          | 11          | 11      |         | 11               | 11      |         |
| D7S820                           | 10          | 10      |         | 10               | 10      |         |
| D16S539                          | 11          | 12      |         | 11               | 12      |         |
| VWA                              | 15          | 18      |         | 15               | 18      |         |
| TH01                             | 7           | 9       |         | 7                | 9       |         |
| AMEL                             | X           | Y       |         | X                | Y       |         |
| TPOX                             | 6           | 8.3     | 11      | 6                | 11      |         |
| CSF1PO                           | 10          | 12      |         | 10               | 12      |         |
| D12S391                          | 17          | 19      |         |                  |         |         |
| FGA                              | 20          | 24      |         |                  |         |         |
| D2S1338                          | 21          | 22      | 25      |                  |         |         |
| D21S11                           | 28          | 28      |         |                  |         |         |
| D18S51                           | 13          | 16      |         |                  |         |         |
| D8S1179                          | 15          | 17      |         |                  |         |         |
| D3S1358                          | 16          | 16      |         |                  |         |         |
| D6S1043                          | 11          | 20      |         |                  |         |         |
| PENTAE                           | 8           | 12      |         |                  |         |         |
| D19S433                          | 13          | 17      |         |                  |         |         |
| PENTAD                           | 3.2         | 3.2     |         |                  |         |         |
| D1S1656                          | 14          | 17      |         |                  |         |         |
